# Supplementary material for: Spinal muscular atrophy patient-derived motor neurons exhibit hyperexcitability
Source: PubMed Central journal article supplement (PMC4507262; doi:10.1038/srep12189), 2015-07-20
Supplement: srep12189-s1.pdf [file srep12189-s1.pdf]

## **Supplementary information**

### **Spinal muscular atrophy patient-derived motor neurons exhibit hyperexcitability**

Huisheng Liu<sup>1\*,#</sup>, Jianfeng Lu<sup>1\*</sup>, Hong Chen<sup>1</sup>, Zhongwei Du<sup>1</sup>, Xue-Jun Li<sup>3</sup>, and Su-Chun Zhang<sup>1,2#</sup>

<sup>1</sup>Waisman center, University of Wisconsin, Madison, WI, 53705, USA

<sup>2</sup>Department of Neuroscience and Department of Neurology, School of Medicine and Public Health, University of Wisconsin, Madison, WI 53705, USA

<sup>3</sup>Department of Neuroscience, University of Connecticut Health Center, Farmington, CT 06030, USA

\* These authors contribute equally.

# Correspondence: Liu25@ Wisc.Edu or Zhang@Waisman.Wisc.Edu

**Supplementary Figure S1**

**Supplementary Figure S2**

**Supplementary Figure S3**

**Supplementary Figure S4**

**Supplementary Figure S5**

**Supplementary Table S1**

**Supplementary Table S2**

**Supplementary Table S3**

**Supplementary Figure S1. Characterization of SMA and control iPSCs.**

- (a) Representative phase contrast images for fibroblasts and iPSCs as well as immunostaining images of iPSC clones generated from 2 controls and 3 type-I SMA patients.
- (b) Karyotyping and G-banding analysis of iPSC lines.
- (c) qPCR measurement for endogenous and exogenous pluripotent transcription factors (Relative to GAPDH and normalized to H9 group (Cont1-1), n = 3 independent experiments). En, endogenous; Ex, exogenous; O, OCT4; S, SOX2; K, KLF-4; M, c-MYC; 4F / 3d, infection of 4 factors of O, S, K and M (4F) for 3 days.
- (d) H&E staining of sections of teratomas from iPSCs showing cartilage (mesoderm), gut epithelia (endoderm) and epiderm (ectoderm) like structures.
- All data shown represent mean  $\pm$  SEM.

**Supplementary Figure S2. SMA iPSCs generate MNs as efficiently as control PSCs.**

- (a) Representative images of MNPs, identified by OLIG2, from control and SMA NS at d14 after differentiation.
- (b) Representative MNX1<sup>+</sup> MNs generated from control and SMA iPSCs 48-hour after plating at d21 after differentiation.
- (c) Representative ChAT<sup>+</sup> MNs at d49 after differentiation.

**Supplementary Figure S3. Full-length blots for key data in the main figures.**

- (a - c) Full length of western-blot images of Figure 1e and j (a), Figure 4b (b) and Figure 4d (c).

**Supplementary Figure S4. Investigating electrophysiological activities in MNs differentiated from control and SMA iPSCs.**

Representative images of recorded neurons at the 7<sup>th</sup> week after differentiation from normal control and SMA iPSCs. Neurobiotin was injected to neurons during recording and used to identify the type of cells after recording

**Supplementary Figure S5. SMA MNs display normal potassium channel activities.**

- (a) Representative potassium currents ( $I_K$ ) elicited from -50 mV with a holding potential of -70 mV by 10 mV steps to potential of +50 with 500 ms duration in control and SMA MNs. 1  $\mu$ M TTX and 0.2 mM Cd<sup>2+</sup> were added in bath solution to block Na<sup>+</sup> and Ca<sup>2+</sup> currents, respectively. Depolarization voltage steps of increasing amplitudes were delivered every 3 s.
- (b) Current-voltage relations for the normalized peak currents to membrane capacitance, evoked between -50 and +50 mV in 10 mV increments in normal control and SMA MNs. Inset: enlargement of the last two data points. For each condition, we recorded from 18-

20 cells from a total of six coverslips, where two coverslips were obtained from each of three independent experiments. All data shown represent mean  $\pm$  SEM.

**Supplementary Table S1. Stem cell lines and replication, related to Human Pluripotent Stem Cells (PSCs)**

| Group   | Cat. ID               | Diagnosis | Gender | Genetic background                                                             | Age at biopsy | clones | replications |
|---------|-----------------------|-----------|--------|--------------------------------------------------------------------------------|---------------|--------|--------------|
| Contl-1 | WA09<br>(known as H9) | Normal    | N/A    | N/A                                                                            | N/A           | 1      | 3            |
| Contl-2 | GM03814               | Carrier   | Female | 2 copies of <i>SMN2</i> , heterozygous $\Delta$ <i>SMN7/8</i> of <i>SMN1</i> . | Adult         | 1      | 3            |
| Contl-3 | GM03815               | Carrier   | Male   | 2 copies of <i>SMN2</i> , heterozygous $\Delta$ <i>SMN7/8</i> of <i>SMN1</i> . | Adult         | 1      | 3            |
| SMA-1   | GM03813               | Type-1    | Male   | 2 copies of <i>SMN2</i> , homozygous $\Delta$ <i>SMN7/8</i> of <i>SMN1</i> .   | 3y            | 1      | 3            |
| SMA-2   | GM09677               | Type-1    | Male   | 2 copies of <i>SMN2</i> , homozygous $\Delta$ <i>SMN7/8</i> of <i>SMN1</i> .   | 2y            | 1      | 3            |
| SMA-3   | GM00232               | Type-1    | Male   | 1 copies of <i>SMN2</i> , homozygous $\Delta$ <i>SMN7/8</i> of <i>SMN1</i> .   | 7m            | 1      | 3            |

**Supplementary Table S2. Primary antibodies, related to Alkaline Phosphatase Staining, Immunocytochemistry and Quantification**

| Antibody | Isotype    | Dilution | Source               |
|----------|------------|----------|----------------------|
| ChAT     | Goat IgG   | 1:300    | Chemicon & Millipore |
| Flag     | Mouse IgG  | 1:1000   | Sigma                |
| SMN      | Rabbit IgG | 1:500    | Santa Cruz           |
| MNX1/H9  | Mouse IgG  | 1:50     | DSHB                 |
| NONAG    | Rabbit IgG | 1:500    | R&D                  |
| NSE      | Rabbit IgG | 1:1000   | Abcam                |
| OCT4     | Mouse IgG  | 1:500    | Chemicon & Millipore |
| OLIG2    | Rabbit IgG | 1:500    | Chemicon & Millipore |
| SEEA4    | Mouse IgG  | 1:1000   | DSHB                 |
| SOX2     | Goat IgG   | 1:1000   | R&D                  |
| TRA-1-60 | Mouse IgG  | 1: 50    | Chemicon & Millipore |
| TuJ1     | Mouse IgG  | 1:200    | Chemicon & Millipore |
| VACHT    | Rabbit IgG | 1:1000   | Sigma                |

**Supplementary Table S3. Primers for real-time PCR and DNA PCR**

| Name                                 | Forward Primer Sequence    | Reverse Primer Sequence      |
|--------------------------------------|----------------------------|------------------------------|
| Real-time PCR primer                 |                            |                              |
| EXO-OCT4                             | 5'GGGTGGACCATCCTCTAGAC3'   | 5'CCAGGTCCGAGGATCAAC3'       |
| EXO-SOX2                             | 5'GGGTGGACCATCCTCTAGAC3'   | 5'GGGCTGTTTTCTGGTTG3'        |
| EXO-KLF-4                            | 5'GGGTGGACCATCCTCTAGAC3'   | 5'GGAAGTCGCTTCATGTGG3'       |
| EXO-c-MYC                            | 5'GGGTGGACCATCCTCTAGAC3'   | 5'CCTCGTCGCAGTAGAAATAC3'     |
| EN-OCT4                              | 5'AGTTTGTGCCAGGGTTTTTG3'   | 5'ACTTCACCTCCCTCCAACC3'      |
| EN-SOX2                              | 5'CAAAAATGGCCATGCAGGTT3'   | 5'AGTTGGGATCGAACAAAAGCTATT3' |
| EN-KLF-4                             | 5'AGCCTAAATGATGGTGCTTGGT3' | 5'TTGAAAACCTTGGCTTCCTTGTT3'  |
| EN-c-MYC                             | 5'CGGGCGGGCACTTTG3'        | 5'GGAGAGTCGCGTCCTTGCT3'      |
| SMN-FL                               | 5'ATGTTAATTTTCATGGTACATG3' | 5'GGAATGTGAGCACCTTCCTTC3'    |
| GAPDH                                | 5'GAAGGTGAAGGTCGGAGTC 3'   | 5'GAAGATGGTGATGGGATTTTC3'    |
| DNA PCR primer (for DdeI experiment) |                            |                              |
| SMN                                  | 5'CAAGCCCAAATCTGCTCCAT 3'  | 5'TACAATGAACAGCCATGTCC3'     |

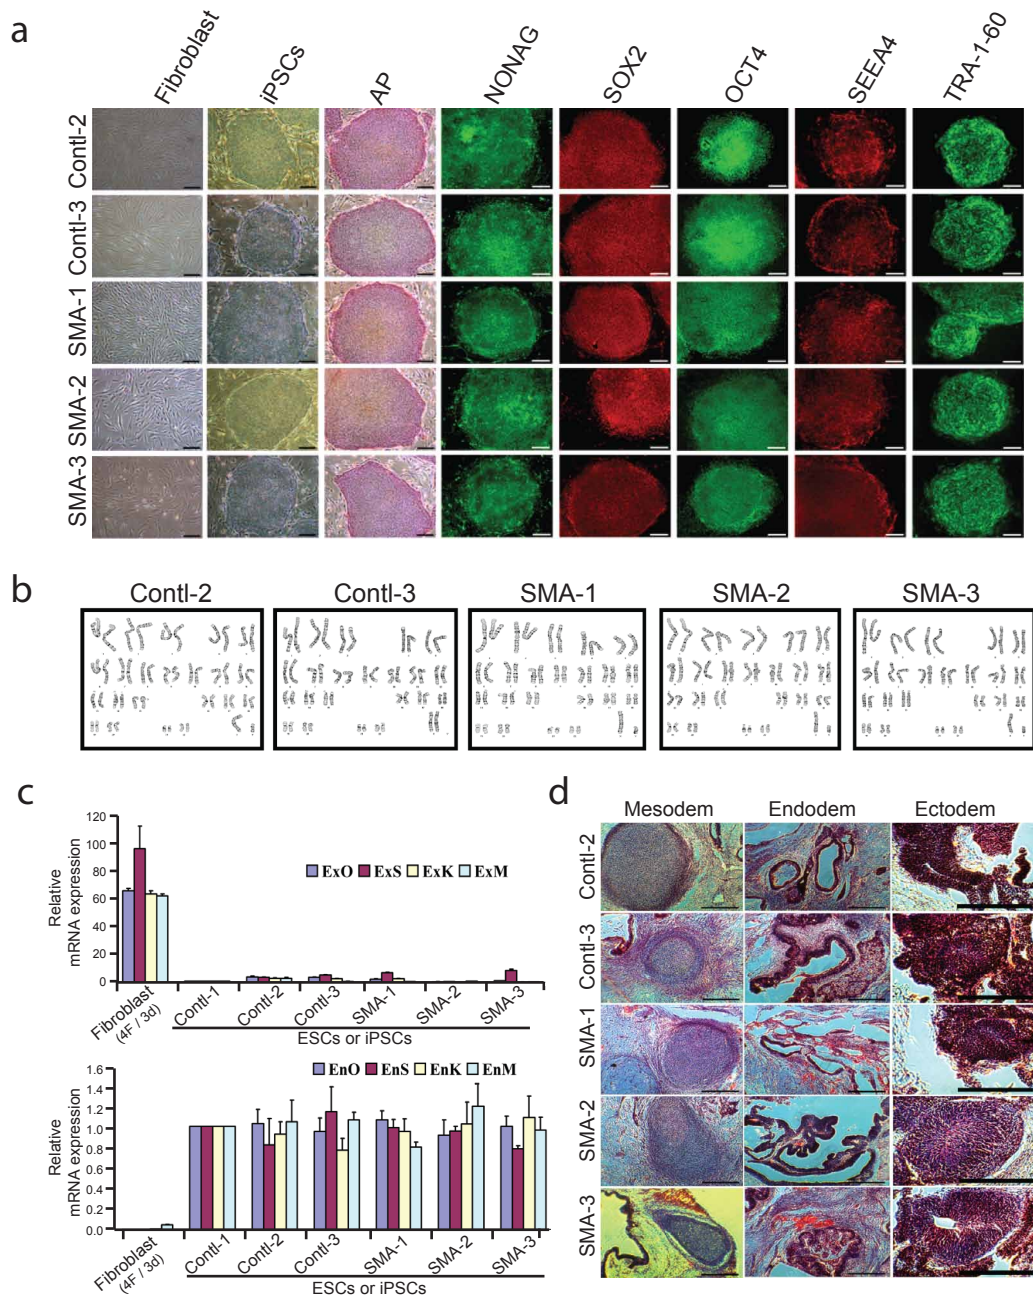

Supplementary Figure S1

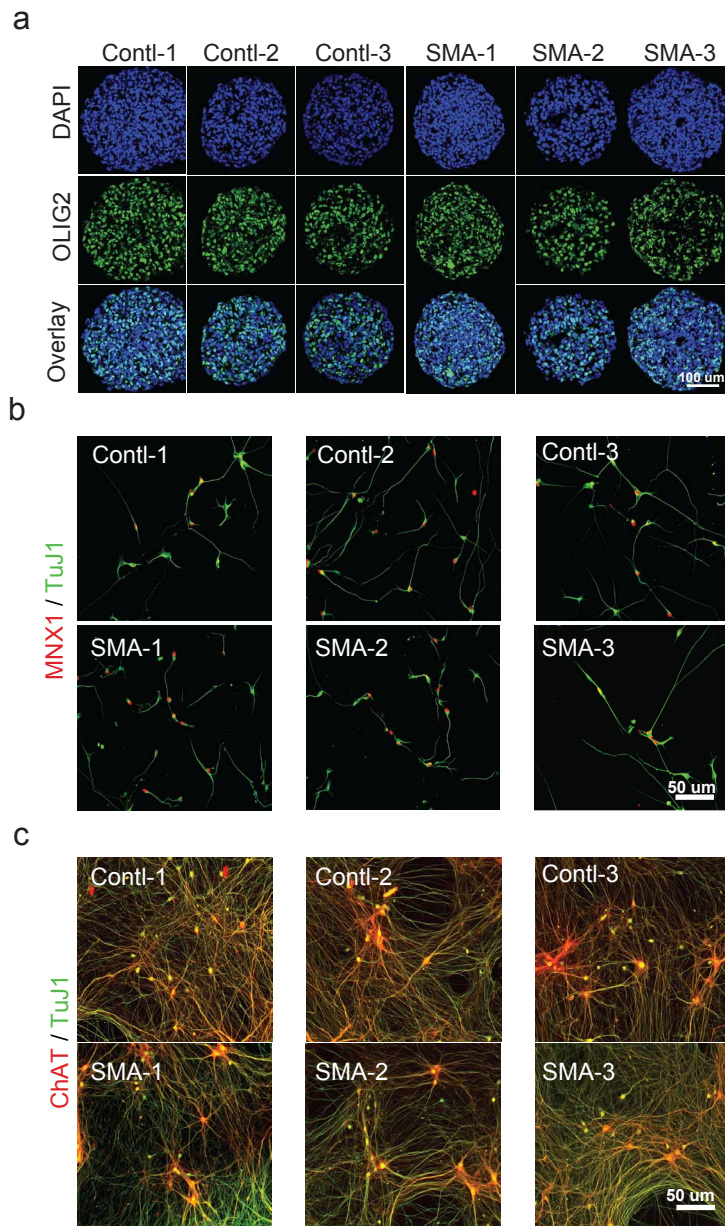

Supplementary Figure S2

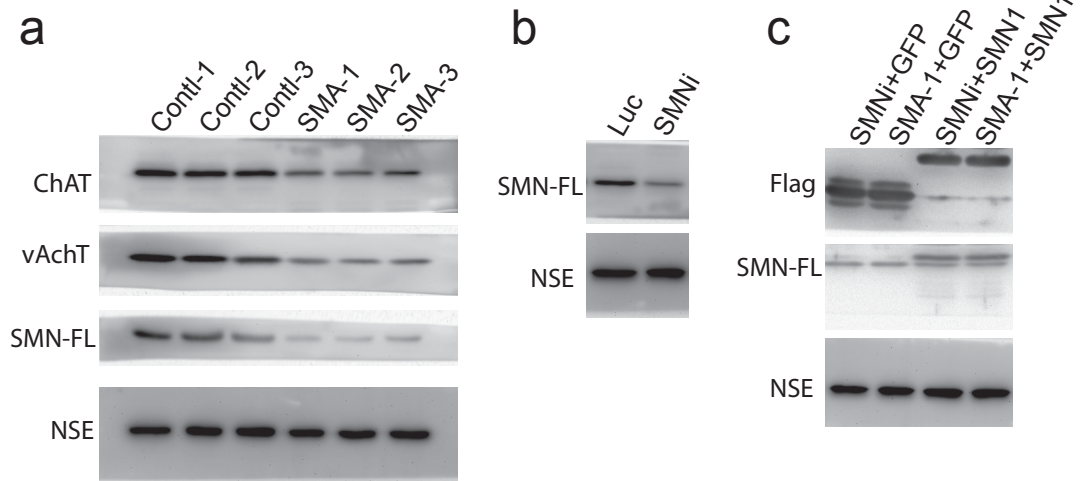

Supplementary Figure S3

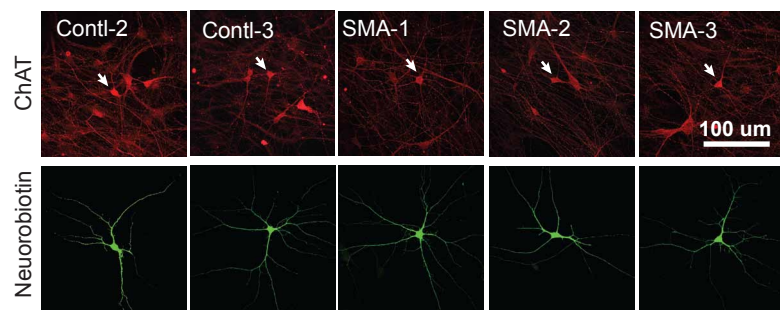

Supplementary Figure S4



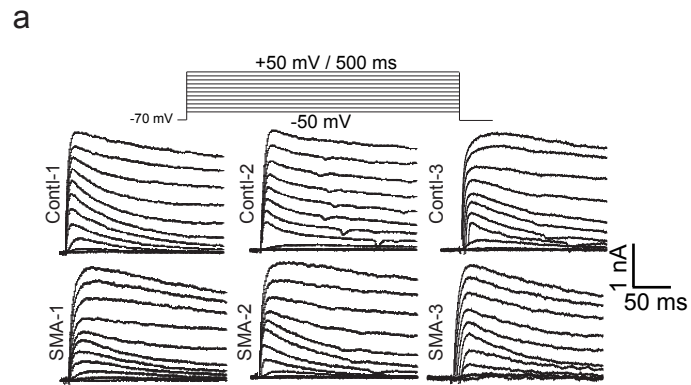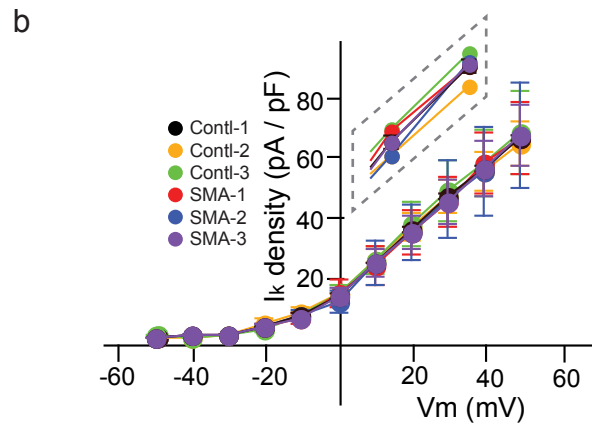

Supplementary Figure S5
